# Supplementary material for: A novel pathway to produce butanol and isobutanol in Saccharomyces cerevisiae
Source: PubMed Central journal article supplement (PMC3662618; doi:10.1186/1754-6834-6-68), 2013-05-04
Supplement: 1754-6834-6-68-S1.pdf [file 1754-6834-6-68-S1.pdf]

## **Additional files**

**Additional file 1 – Sequence of synthesized *goxB* gene with codone usage**

**optimized for *Saccharomyces cerevisiae***

ATGAAGAAACACTACGACACTGCAGTTATAGGTGGAGGGATCATTGGTTG  
TGCGATATCGTACGAATTGGCCAAAACCTCAACAGAAGGTTGTCCTGCTAG  
AAGCTGGAGAAGTAGGTAGAAAGACTACTAGTGCTGCTGCTGGAATGCTT  
GGAGCTCATGCCGAATGCGAAAACAGGGATGCTTTCTTTGACTTTGCCAT  
GCACTCACAAAGGCTTTATGAACCAGCAGGGCAAGAATTGGAAGAAGCA  
TGTGGTATTGATATTAGACGTCATAATGGCGGAATGTTGAAGTTAGCCTAT  
ACGGAAGAGGATATTGCCTGTTTAAGAAAGATGGATGATTTACCTAGCGT  
TACCTGGTTGTCTGCTGAAGATGCATTGGAGAAGGAACCTTATGCATCGA  
AAGACATACTAGGTGCATCCTTTATAAAAGATGATGTGCACGTAGAACCG  
TATTATGTCTGCAAAGCCTACGCTAAAGGGGCTAGGAGATATGGTGCTGA  
CATTTACGAACACACACAAGTCACCTCAGTGAAAAGAATGAACGGAGAG  
TATTGCATCACAACATCAGGTGGAGATGTTTATGCCGACAAGGTTGCAGT  
TGCTTCTGGTGTATGGTCTGGTCGTTTCTTTTCCCAGTTAGGTTTAGGTCAA  
CCATTCTTTCCAGTAAAAGGCGAGTGTTTGAGTGTTTGGAATGACGATACC  
CCATTAACCAAGACTCTTTACCATGACCATTGTTACGTGGTTCCAAGAAAG  
TCCGGCAGATTGGTCATTGGTGCCACTATGAAACATGGTGATTGGTCTGAT  
ACACCTGACATTGGTGGCATTGAAGCTGTGATTGGTAAGGCGAAAACGAT  
GCTACCAGCAATTGAGCACATGAAAATCGATAGATTTTGGGCGGGTTTAA  
GACCGGGAACAAGAGATGGCAAACCCTTCATTGGGAGACATCCCGAAGA  
TAGCGGCATAATCTTTGCAGCCGGTCATTTAGAAATGGCATACTGCTGG  
CTCCTGCAACAGCTGAAATGGTCAGAGACATGATCTTGGAACGTCAGATA

AAACAAGAGTGGGAAGAGGCATTTAGGATCGATAGAAAAGAGGCGGTC  
ATATCTAA
